# Supplementary material for: Comprehensive multi-omics analysis and experimental validation indicate that VPS35 is a promising biomarker for prognosis, immunotherapy, and chemotherapy in LIHC
Source: Royal Society of Chemistry journal article supplement (doi:10.1039/d5md00834d), 2026-01-01
Supplement: d5md00834d1.pdf [file d5md00834d1.pdf]

Table S1. Details of LIHC patients

|           | Age | Gender | Clinical<br>stages | Pathological<br>grade | AFP(ng/ml) |
|-----------|-----|--------|--------------------|-----------------------|------------|
| Patient 1 | 65  | Man    | III                | G2                    | 110        |
| Patient 2 | 82  | Woman  | III                | G3                    | 1430       |
| Patient 3 | 45  | Man    | I                  | G1                    | 480        |
| Patient 4 | 33  | Woman  | II                 | G3                    | 314        |
| Patient 5 | 58  | Man    | I                  | G1                    | 220.5      |

FigS1

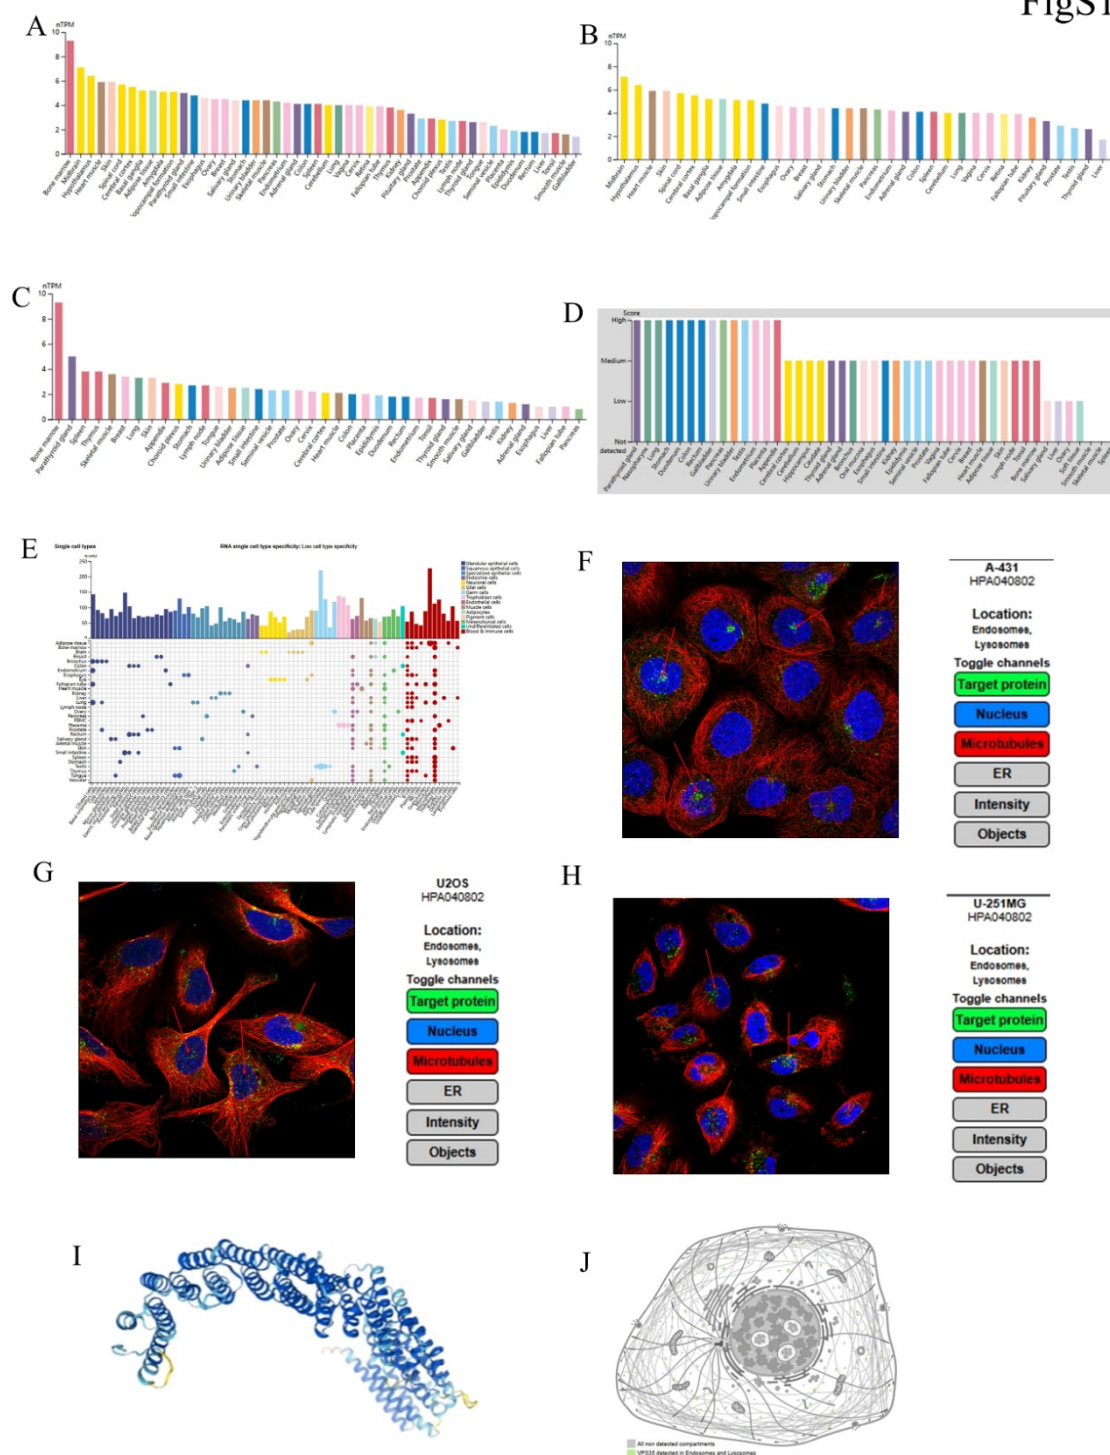

**FigureS1.** The expression of VPS35 in human organs and tissues. (A-C) Summarized VPS35 mRNA expression in various organs and tissues, based on the consensus, GTEx and HPA dataset. (D) VPS35 protein expression in human organs and tissues. (E) The expression of VPS35 in various single-cell tissues. (F-J) The subcellular localization of VPS35, as depicted by immunofluorescence visualization in HPA database.

FigS2

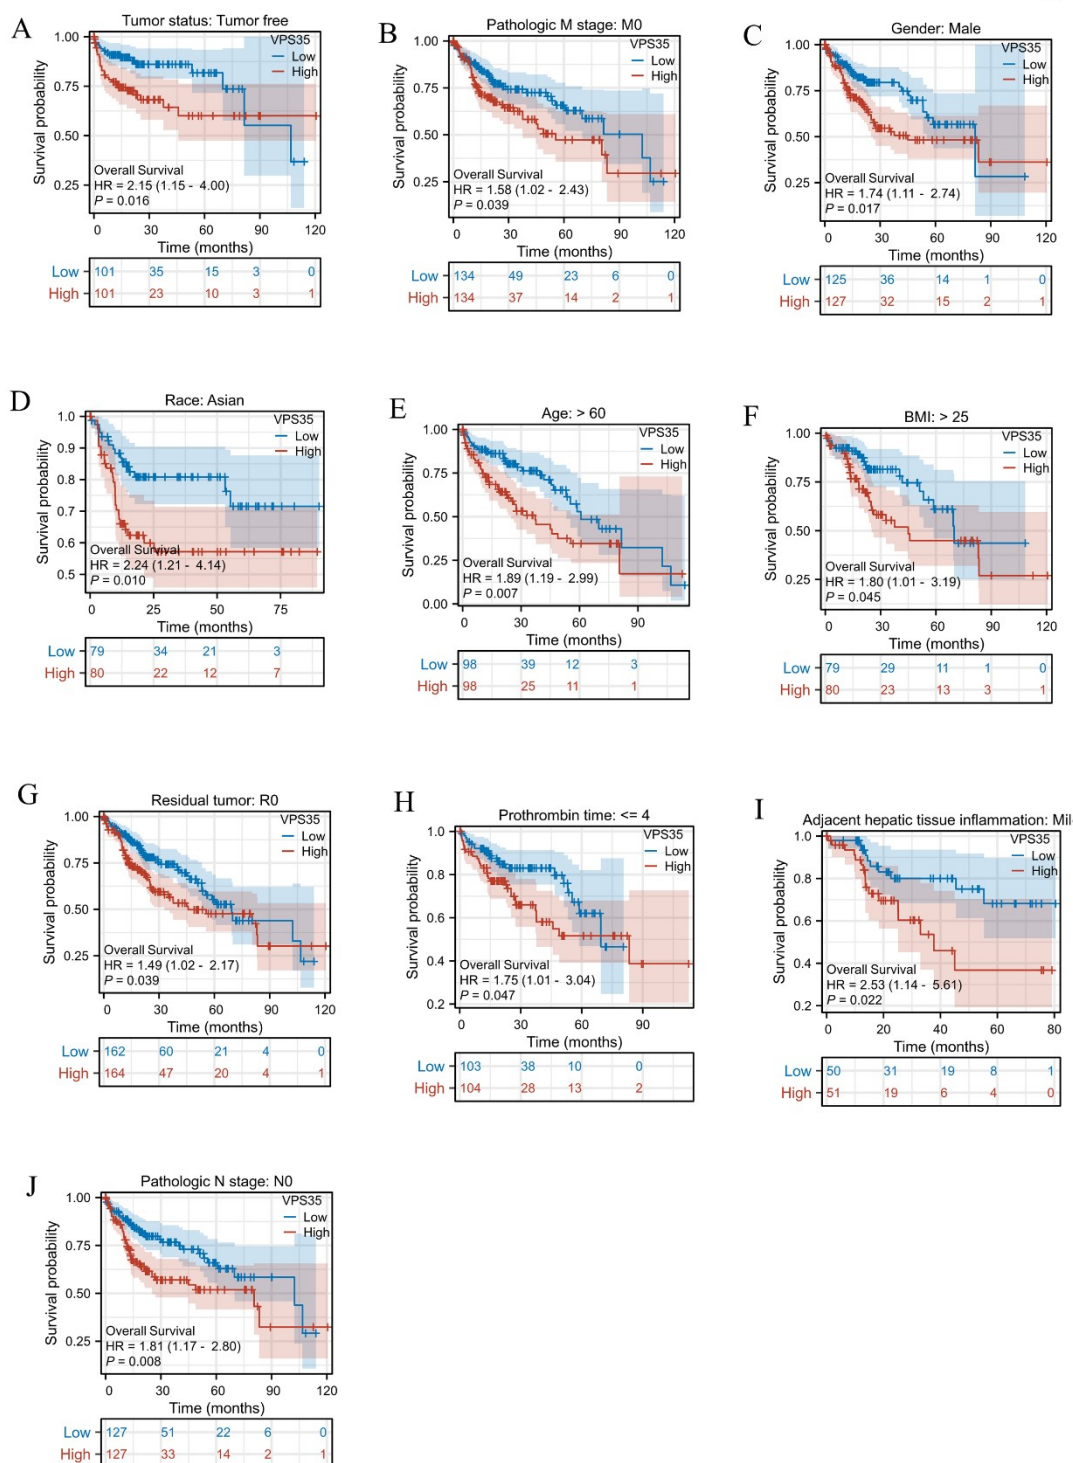

**FigureS2.** Kaplan-Meier curve analysis of the OS of VPS35 in different clinical subtypes. (A)Tumor status: Tumor free. (B)Pathologic M stage: M0. (C) Gender: male. (D) Race: Asian. (E) Age > 60. (F) BMI >25. (G) Residual tumor: Ro. (H)Prothrombin time ≤4. (I)Adjacent hepatic tissue inflammation: Mil. (J)Pathologic N stage: N0.

FigS3

A

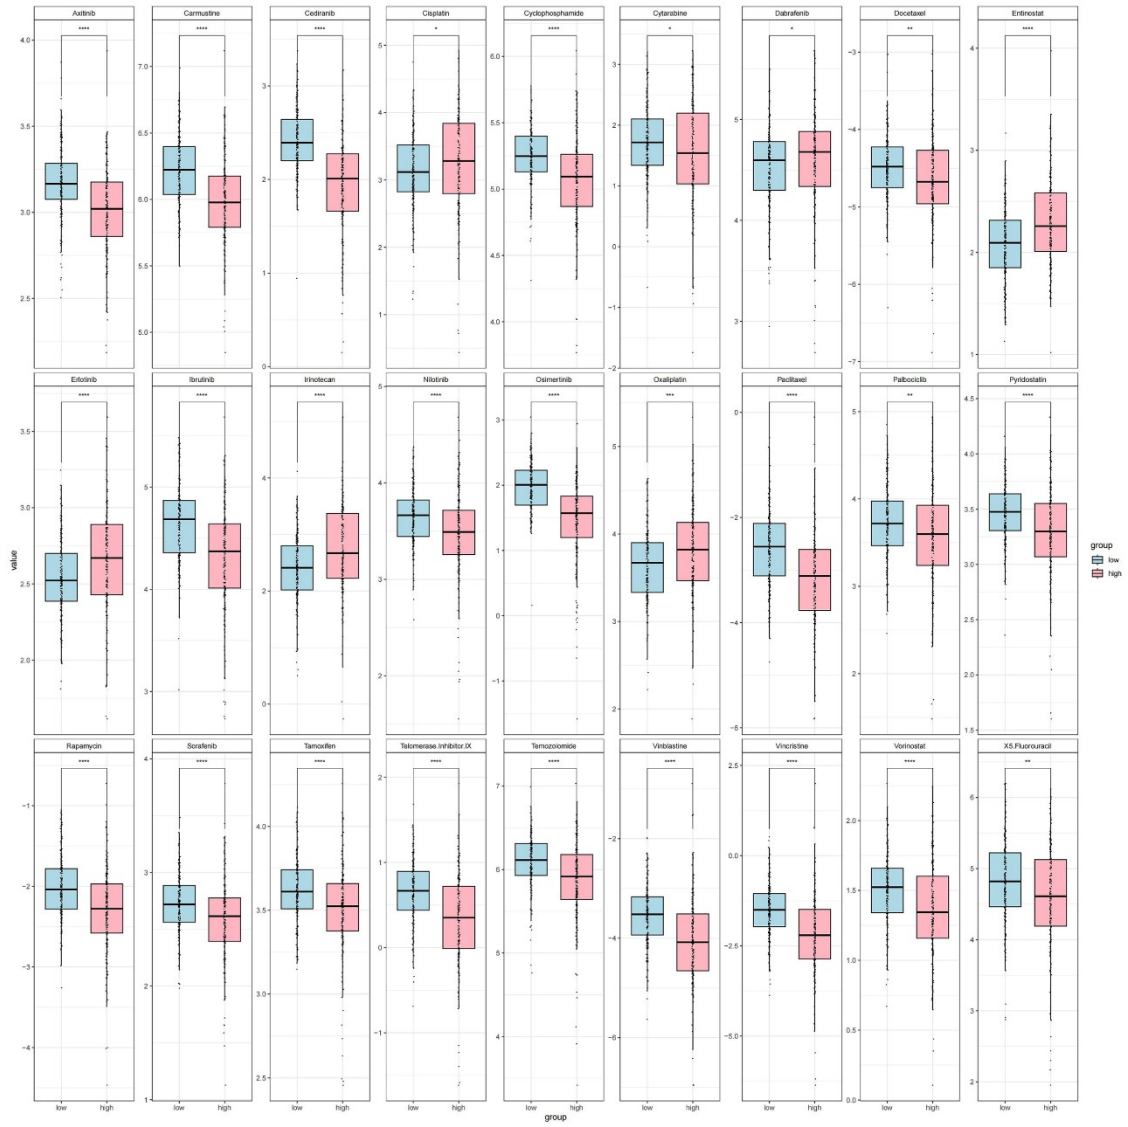

**FigureS3.** The immunotherapy and chemotherapy response analysis of VPS35. (A) The chemotherapeutic drug half-inhibitory concentration (IC<sub>50</sub>) values in VPS35-high and VPS35-low samples. (ns: no significance; \*  $p < 0.05$ ; \*\*  $p < 0.01$ ; \*\*\*  $p < 0.001$ ).
